# Supplementary material for: Performance of the LIAISON® SARS-CoV-2 Antigen Assay vs. SARS-CoV-2-RT-PCR
Source: MDPI journal article supplement (doi:10.3390/pathogens10060658), 2021-05-26
Supplement: s1 [file s1]

**Supplement:**

**Raw values for Table 2**

**Cut-off 22.79 TCID<sub>50</sub>/ml**

Count

|                                                                             |          | RT-PCR   |          | Total |
|-----------------------------------------------------------------------------|----------|----------|----------|-------|
|                                                                             |          | negative | positive |       |
| <b>Antigen assay</b><br><b>Cut-off</b><br><b>22.79 TCID<sub>50</sub>/ml</b> | negative | 58       | 9        | 67    |
|                                                                             | positive | 14       | 101      | 115   |
| Total                                                                       |          | 72       | 110      | 182   |

**Cut-off 23.56 TCID<sub>50</sub>/ml**

Count

|                                                                             |          | RT-PCR   |          | Total |
|-----------------------------------------------------------------------------|----------|----------|----------|-------|
|                                                                             |          | negative | positive |       |
| <b>Antigen assay</b><br><b>Cut-off</b><br><b>23.56 TCID<sub>50</sub>/ml</b> | negative | 60       | 10       | 70    |
|                                                                             | positive | 12       | 100      | 112   |
| Total                                                                       |          | 72       | 110      | 182   |

**Cut-off 57.68 TCID<sub>50</sub>/ml**

Count

|                                                          |          | RT-PCR   |          | Total |
|----------------------------------------------------------|----------|----------|----------|-------|
|                                                          |          | negative | positive |       |
| Antigen assay<br>Cut-off<br>57.68 TCID <sub>50</sub> /ml | negative | 71       | 23       | 94    |
|                                                          | positive | 1        | 87       | 88    |
| Total                                                    |          | 72       | 110      | 182   |

**Cut-off 100 TCID<sub>50</sub>/ml**

Count

|                                                        |          | RT-PCR   |          | Total |
|--------------------------------------------------------|----------|----------|----------|-------|
|                                                        |          | negative | positive |       |
| Antigen assay<br>Cut-off<br>100 TCID <sub>50</sub> /ml | negative | 72       | 27       | 99    |
|                                                        | positive | 0        | 83       | 83    |
| Total                                                  |          | 72       | 110      | 182   |
